# Supplementary material for: Diffusion doping route to plasmonic Si/SiOxnanoparticles
Source: Royal Society of Chemistry journal article supplement (doi:10.1039/c8ra03260b), 2018-01-01
Supplement: c8ra03260b1.pdf [file c8ra03260b1.pdf]

## Diffusion doping route to plasmonic Si/SiO<sub>x</sub> nanoparticles

S.S. Bubenov<sup>a</sup>, S.G. Dorofeev<sup>a</sup>, A.A. Eliseev<sup>a,b</sup>, N.N. Kononov<sup>c</sup>, A.V. Garshev<sup>b</sup>,  
N.E. Mordvinova<sup>a,d</sup>, O.I. Lebedev<sup>d</sup>

<sup>a</sup> Department of Chemistry, Lomonosov Moscow State University, 1-3 Leninskie Gory, Moscow 119991, Russia

<sup>b</sup> Department of Materials Science, Lomonosov Moscow State University, 1-73 Leninskie Gory, Moscow 119991, Russia

<sup>c</sup> Prokhorov General Physics Institute, Russian Academy of Sciences, 38 Vavilova st., Moscow 119333, Russia

<sup>d</sup> Laboratoire CRISMAT, UMR6508, CNRS-ENSICAEN, 6 boulevard Marechal Juin, Caen 14050, France

### Electronic Supplementary Information

#### I. Results of thermopower measurements.

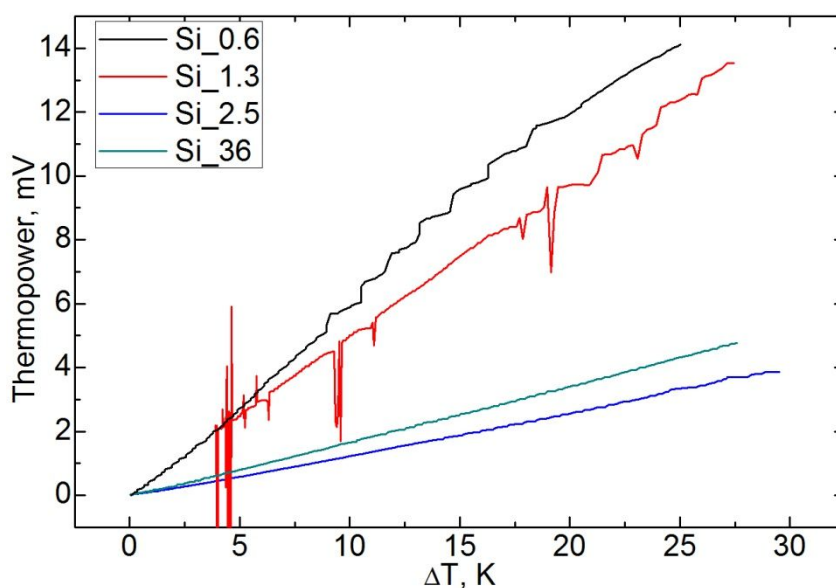

Figure S1. Thermopower generated by pellet samples of doped semiconductor nanoparticles vs temperature difference between top and bottom contacts; temperature of massive bottom contact was 23°C (see main text).

## II. General characterization of IR spectra of the samples.

Examination of IR spectra of synthesized samples of silicon semiconductor nanoparticles (SNPs) in wavenumber region  $>700\text{ cm}^{-1}$  reveals the following. Every sample both in KBr pellet and in thin film form exhibits a peak at  $\sim 1060\text{ cm}^{-1}$  with two prominent shoulders at  $870$  and  $1200\text{ cm}^{-1}$  and a broad band spanning over  $3000\text{-}3700\text{ cm}^{-1}$ . The former feature is accounted for with  $\delta_{\text{H-Si-O}_3}$  ( $870\text{ cm}^{-1}$ ),  $\nu_{\text{Si-O-Si, TO}}$  ( $1100\text{ cm}^{-1}$ ) and  $\nu_{\text{Si-O-Si, LO}}$  ( $1200\text{ cm}^{-1}$ ) modes [s1,s2], while the latter is due to  $\nu_{\text{Si-OH}}$  ( $3200\text{-}3700\text{ cm}^{-1}$ ) [s2] and  $\nu_{\text{OH}}$  of water and other hydroxyl groups. Some spectra also show two peaks at  $\sim 1400$  and  $\sim 1600\text{ cm}^{-1}$ . These correspond to deformational  $\nu_{\alpha}$  modes of  $\text{OH}^-$  and  $\text{H}_2\text{O}$ , respectively [s3].  $\nu_{\text{Si-O-Si}}$  and  $\nu_{\alpha}$  features are situated in a spectral region of prominent absorption of localized surface plasmon resonance (LSPR) band when the latter is present in the spectrum. As a consequence of considerable coupling  $\nu_{\alpha}$  vibrations are then very asymmetrical and  $\nu_{\text{Si-O-Si}}$  appear to have asymmetric "Fano-type" profile against the background of LSPR. The LSPR band in the studied samples has a maximum in  $1600\text{-}2200\text{ cm}^{-1}$  region and a considerable FWHM of  $\sim 2000\text{ cm}^{-1}$ . Characteristic triple feature of methyl and methylene groups is also observed in some samples:  $\nu_{\text{s, C-H, methylene}}$  ( $2860\text{ cm}^{-1}$ ),  $\nu_{\text{as, C-H, methylene}}$  ( $2930\text{ cm}^{-1}$ ),  $\nu_{\text{s, C-H, methyl}}$  ( $2960\text{ cm}^{-1}$ ).  $\nu_{\text{as, C-H, methyl}}$  mode is also present, as indicated by increased absorption at  $\sim 2880\text{ cm}^{-1}$ . The methyl and methylene features are mainly present in etched samples, as hydride terminated nanosilicon is a strong reducing agent and is capable of reducing  $\text{CO}_2$  from atmosphere or, possibly, traces of ethanol in sols of SNPs. Spectral peculiarities of individual samples are summarized in Table S1.

**Table S1.** Presence, intensity and position of select bands in IR spectra of samples of Si SNPs.

| Sample | Acquisition regime:<br>form of sample/<br>preconditioning |          | number<br>of<br>etching<br>steps | LSPR<br>mode<br>position,<br>cm <sup>-1</sup> | $\nu_{\alpha}$ | $\nu_{s, C-H}$ ,<br>and<br>$\nu_{as, C-H}$ | $\nu_{Si-OH}$ and<br>$\nu_{OH}$ |       |
|--------|-----------------------------------------------------------|----------|----------------------------------|-----------------------------------------------|----------------|--------------------------------------------|---------------------------------|-------|
| Si_0   | pellet                                                    |          | 0                                | none                                          | +              |                                            | prominent                       |       |
|        | film                                                      |          | -//-                             | -//-                                          | +              | +                                          | prominent                       |       |
|        |                                                           | degassed | -//-                             | -//-                                          |                |                                            | +                               | minor |
| Si_1.3 | pellet                                                    |          | -//-                             | -//-                                          | +              | +                                          | prominent                       |       |
|        | film                                                      |          | -//-                             | -//-                                          | +              | +                                          | prominent                       |       |
|        |                                                           | degassed | -//-                             | -//-                                          | +              |                                            |                                 | minor |
| Si_2.5 | pellet                                                    |          | -//-                             | -//-                                          | +              | +                                          | prominent                       |       |
| Si_9.1 | film                                                      |          | -//-                             | 1860                                          |                |                                            | prominent                       |       |
|        |                                                           |          | 1                                | 1800                                          | +              | +                                          | -//-                            |       |
|        |                                                           |          | 2                                | ~1800                                         | +              | +                                          | -//-                            |       |
|        |                                                           | degassed | 0                                | 1990                                          |                |                                            |                                 | minor |
|        |                                                           |          | 1                                | 2030                                          | +              | +                                          | -//-                            |       |
|        |                                                           |          | 2                                | 2190                                          | +              | +                                          | -//-                            |       |
| Si_20  | pellet                                                    |          | 0                                | 1760                                          | +              | +                                          | prominent                       |       |
|        | film                                                      |          | 0                                | 1880                                          |                |                                            | -//-                            |       |
|        |                                                           |          | 1                                | 1913                                          | +              | +                                          | -//-                            |       |
|        |                                                           |          | 2                                | 1790                                          | +              | +                                          | -//-                            |       |
|        |                                                           | degassed | 0                                | 1990                                          |                |                                            |                                 | minor |
|        |                                                           |          | 1                                | 2030                                          |                | +                                          | -//-                            |       |
|        |                                                           |          | 2                                | 1880                                          |                | +                                          | -//-                            |       |
| Si_36  | pellet                                                    |          | 0                                | 1890                                          | +              | +                                          | prominent                       |       |
|        | film                                                      |          | 0                                | 1710                                          |                |                                            | -//-                            |       |
|        |                                                           |          | 1                                | 1850                                          | +              | +                                          | -//-                            |       |
|        |                                                           |          | 2                                | 1830                                          | +              | +                                          | -//-                            |       |
|        |                                                           |          | 3                                | ~1660                                         | +              | +                                          | -//-                            |       |
|        |                                                           |          | 4                                | ~1600                                         | +              | +                                          | -//-                            |       |
|        |                                                           | degassed | 0                                | 1840                                          |                |                                            |                                 | minor |
|        |                                                           |          | 1                                | 2050                                          |                |                                            | -//-                            |       |
|        |                                                           |          | 2                                | 2020                                          |                |                                            | -//-                            |       |
|        |                                                           |          | 3                                | 1990                                          |                | +                                          | -//-                            |       |
|        |                                                           |          | 4                                | 1800                                          |                |                                            | -//-                            |       |

### III. Lattice expansion evaluation with thermal dependence of XRD pattern.

Thermal XRD experiment was performed for the sample Si\_20. As broad amorphous halo is present at  $2\theta$  of  $\sim 22^\circ$ , diffraction angle region  $15 - 26^\circ$  was excluded from fits. Additional peaks appeared upon heating to  $550^\circ\text{C}$ , that are artifacts associated with material redeposition in the high-temperature attachment (peaks at  $2\theta \approx 37.7; 43.8^\circ$ . Ag: ICDD number 4-783), so regions of  $36 - 39^\circ, 42.5 - 45^\circ$  were omitted as well for that measurement. Lorentian profile allowed to adequately fit diffraction peaks and lattice parameter was determined for different temperatures (Fig.S2).

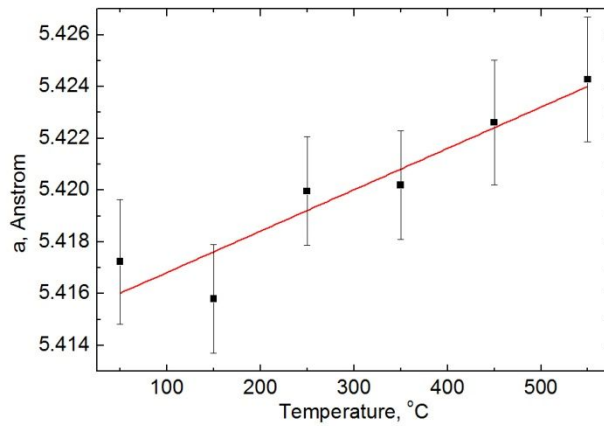

Figure S2. Lattice parameter of Si cores in sample Si\_20 at different temperatures and linear fit of the data.

As a result, linear expansion coefficient  $\alpha_L$  can be estimated as  $3.0 \pm 1.5 \cdot 10^{-6} \text{ K}^{-1}$ . Corresponding changes in the position of plasmonic peak  $\omega_{sp}$  can be derived by the following:

$$\frac{\Delta\omega_{SP}}{\omega_{SP}} = \left(1 + \frac{\Delta N_C}{N_C}\right)^{1/2} - 1 = \left(\frac{1}{1 + \Delta V/V}\right)^{1/2} - 1 = (1 + \alpha_L \cdot \Delta T)^{-3/2} - 1 \approx -\frac{3}{2}\alpha_L \Delta T; \text{ (S1)}$$

where  $N_C$  is the free carrier concentration,  $V$  - the unit cell volume,  $T$  - the temperature. Thus, one can estimate the effect of heating on the position of the maximum as 0.1 - 0.3% ( $\Delta T = 420 \text{ K}$ ). The sample under consideration exhibited 4% reversible loss in  $\omega_{sp}$  when heated from 30 to  $450^\circ\text{C}$ . The value of the same effect for other samples is in the range of 1.7-18%. Thus, thermal expansion of lattice does not account for the red shift of plasmonic peak upon heating, observed for P-doped Si SNPs.

#### IV. Fitting of localized surface plasmon resonance band of P-doped Si nanoparticles

Plasmonic properties of dispersions and films of SNPs are frequently described with a combination of dielectric response of metallic media given by Drude theory and absorption of microspheres according to Mie theory [s1,s4].

Dielectric function of SNPs  $\varepsilon_p$  is then given by:

$$\varepsilon_p = \varepsilon_\infty - \frac{\omega_p^2}{\omega^2 + i\omega\Gamma}; \quad (\text{S2})$$

where  $\omega$  is the excitation frequency,  $\varepsilon_\infty$  - the high-frequency dielectric constant of SNPs,  $\omega_p$  - the plasmonic frequency of SNPs,  $\Gamma$  - the damping term,  $i$  - the imaginary unit.

Absorbance  $A$  of core/shell microspheres in quasistatic limit given by Mie theory [s4] is:

$$A(\omega) = \beta \varepsilon_M^{0.5} \omega \cdot \text{Im} \left( \frac{(\varepsilon_S - \varepsilon_M)(\varepsilon_P(\omega) + 2\varepsilon_S) + \alpha(\varepsilon_P(\omega) - \varepsilon_S)(\varepsilon_M + 2\varepsilon_S)}{(\varepsilon_S + 2\varepsilon_M)(\varepsilon_P(\omega) + 2\varepsilon_S) + 2\alpha(\varepsilon_P(\omega) - \varepsilon_S)(\varepsilon_S - \varepsilon_M)} \right); \quad (\text{S3})$$

where  $\varepsilon_M$  - the dielectric constant of surrounding medium,  $\alpha$  is the volume ratio of cores to the whole nanoparticles,  $\varepsilon_S$  is the dielectric constant of the shell,  $\beta$  is the prefactor given by the following expression:

$$\beta = \frac{6\pi L f_V}{c \cdot \ln(10)}; \quad (\text{S4})$$

where  $f_V$  is the volume fraction of SNPs in the sample,  $L$  - the optical path length,  $c$  - the speed of light.

Spectral region with wavenumber above  $1380 \text{ cm}^{-1}$  was considered for fitting, as below that  $\text{SiO}_x$  absorption is significant. The following constants were adopted  $\varepsilon_\infty = 10.28$  [s5],  $\varepsilon_M = 1$ ,  $\alpha = 0.579$ . The latter value was obtained with results of EDX elemental mapping and XRD discussed in the main body of the article, as well as with elemental analysis of undoped SNPs, revealing mass fraction of silicon of 77%.  $\varepsilon_S$  was treated as real and was modeled by  $(2.105 - 131.3 \cdot \exp(-\omega[\text{cm}^{-1}]/285.6))$  [s6,s7]. Scattering was accounted for with  $c1 + c2 \cdot \omega^4$  baseline [s8].

$\omega_p$ ,  $\Gamma$ ,  $\beta$ ,  $c1$ ,  $c2$  were fit parameters. The fit curves deviate the experimental spectra considerably (Fig. S3), so modifications to the model were sought for.

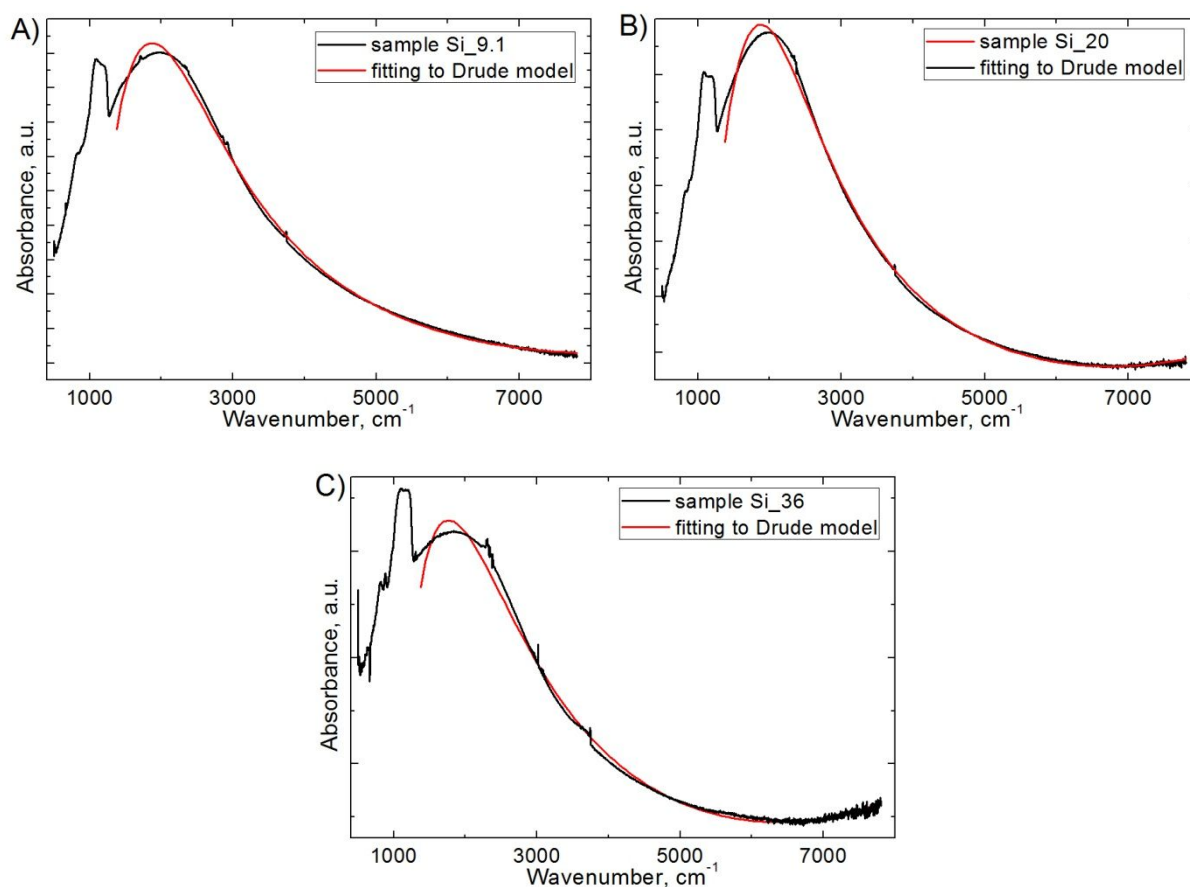

Figure S3. Fitting of IR spectra of Si nanoparticles to Drude oscillator - Mie theory absorption model: A) sample Si\_9.1; B) sample Si\_20; C) sample Si\_36.

Firstly, applicability of Eq.S3 was considered. It is only valid for absorption of plasmonic microspheres up to  $f_v$  values of  $\sim 0.01$ , while  $f_v$  of Si cores in drop-cast films used in this work is about 0.1. An alternative quantification in form of the effective medium approximation accounts for far-field interactions in less dilute dispersions and predicts rather minute deviations from Eq.S3 in the form of the spectrum for  $f_v < 0.2$  especially for the lower wavelength slope of the peak [s4].

Moreover, spectra of SNPs registered for thin films and for pressed KBr pellets exhibit similar lineshapes (Fig.S4). In the latter regime  $f_v$  is  $\sim 5 \cdot 10^{-4}$  and Eq.S3 should be applicable. In that regard, further enhancements to the model were sought in modification of Eq.S2.

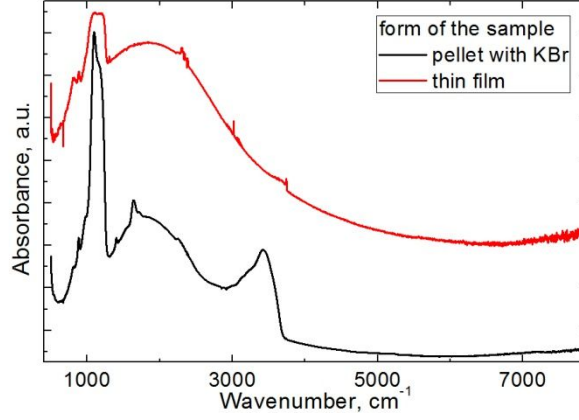

Figure S4. IR spectra of Si<sub>36</sub> sample both in form of pressed pellet with KBr and in form of thin film (see main text). The spectra are offset vertically for clarity.

Indeed, the use of single  $\omega_p$  and  $\Gamma$  values for an ensemble of SNPs is a simplified approach. Ensemble variation of  $\omega_p$  results in smearing of the peak, perceived as increased FWHM. The absorption spectra of such compositionally inhomogeneous samples are still fit reasonably well with use of Eq.S2, resulting only in a slight error in obtained mean  $\omega_p$ , while damping term  $\Gamma$  is greatly overestimated [s4]. On the other hand, nanoparticle size induced variation of  $\Gamma$  counterintuitively leads to slight sharpening of the peak [s4], that isn't observed in case of samples of doped SNPs under consideration. Moreover, both of these phenomena do not account for  $\sim\lambda^{1.5}$  dependence of lower wavelength slope of the peak, discussed in the main body of the article.

Finally, a model with frequency-dependent damping term was considered to account for the power law of the slope and for temperature dependence of the spectra. The following expression was used [s4]:

$$\Gamma = \frac{\Gamma_H \omega^4 + \Gamma_L \omega_0^4}{\omega^4 + \omega_0^4}; \quad (\text{S5})$$

where  $\Gamma_L$  is the low-frequency damping constant,  $\Gamma_H$  - the high-frequency one,  $\omega_0$  - the cross-over frequency. IR spectra of a sample at different temperatures were fit simultaneously to resolve overparameterization, parameters  $\beta$ ,  $\omega_p$ ,  $\Gamma_H$  were considered temperature independent and were shared during the fitting. Resultant fits and  $\Gamma(\omega)$  dependences are shown in Fig. S5.

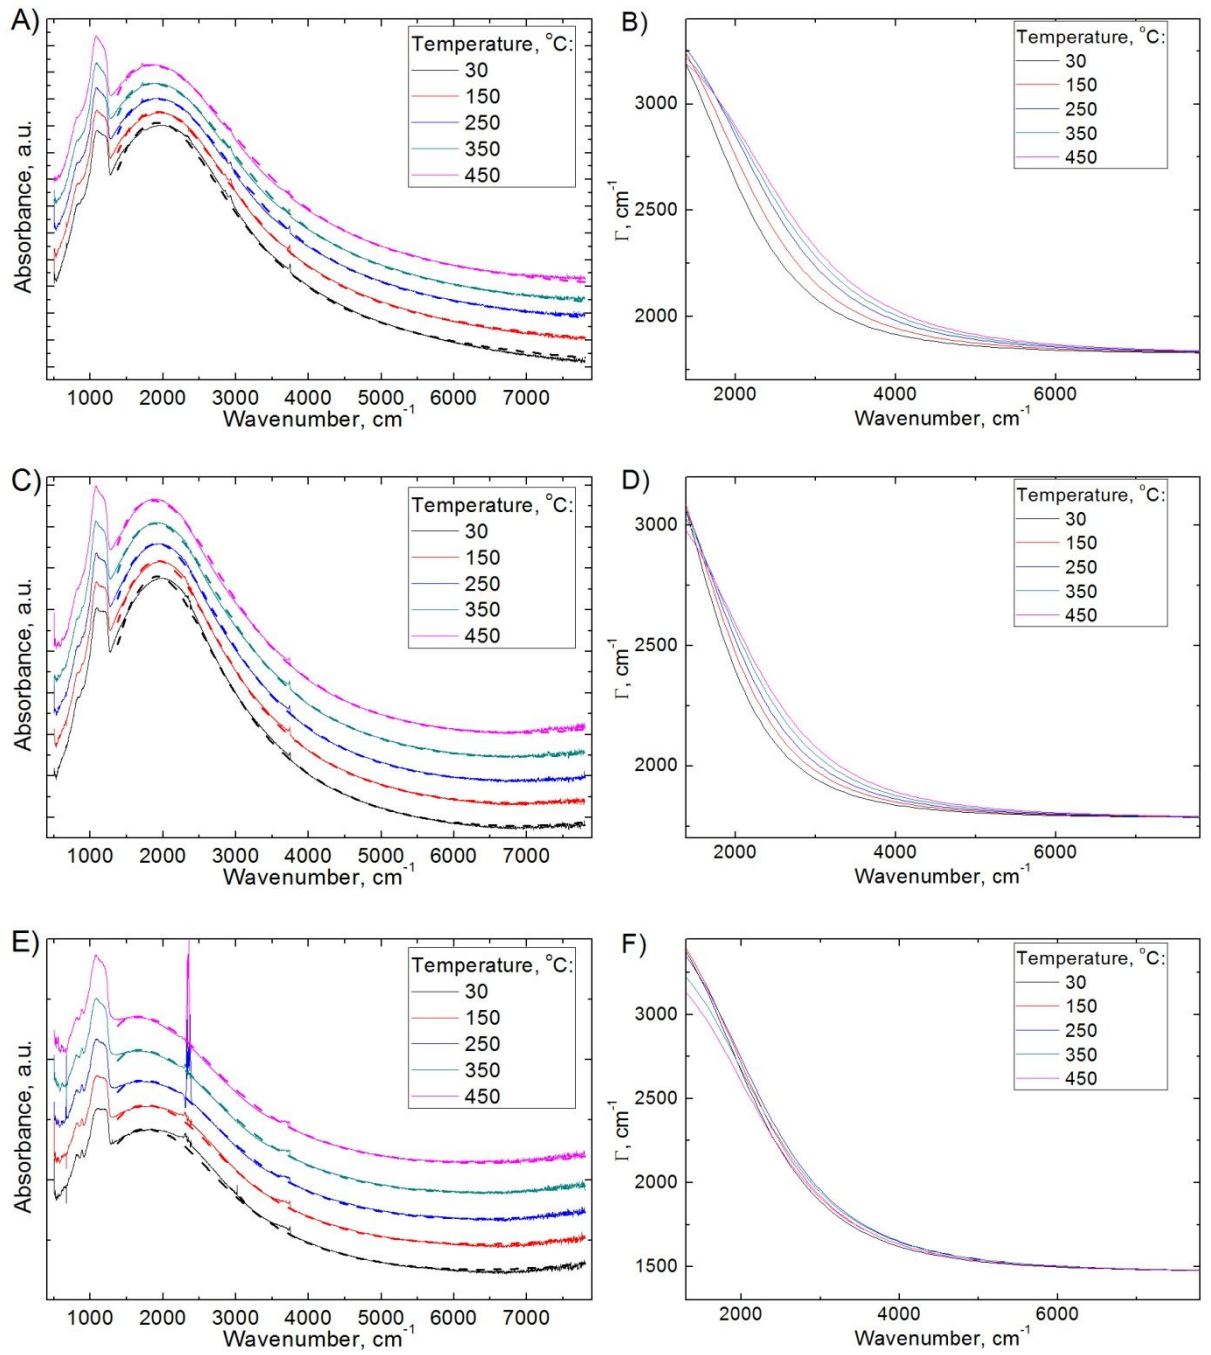

Figure S5. Results of fitting of IR spectra of plasmonic samples at different temperatures: A,C,E) IR spectra (solid lines) and fit curves (dashed lines) for samples Si\_9.1, Si\_20, Si\_36, the spectra are offset vertically for clarity; B,D,F) spectral dependences of the damping term for samples Si\_9.1, Si\_20, Si\_36, respectively.

Plasmonic frequencies corresponding to different fits are summarized in Table S2. A simplistic evaluation by:

$$\omega_P = \omega_{SP} \cdot \sqrt{\epsilon_\infty + 2\epsilon_M}; \quad (S6)$$

is also given. Results of fitting that assumed frequency dependent damping were used for evaluation of carrier generation efficiency.



**Table S2.** Plasmonic frequencies of samples Si\_9.1, Si\_20, Si\_36, calculated with different approaches. Results used for calculation of carrier generation efficiency are in bold.

| Sample        | Plasmonic frequency, $\text{cm}^{-1}$         |                                             |       |
|---------------|-----------------------------------------------|---------------------------------------------|-------|
|               | Fitting ( $\omega$ -independent damping term) | Fitting ( $\omega$ -dependent damping term) | Eq.S6 |
| Si_9.1        | 6600                                          | <b>5500</b>                                 | 7000  |
| Si_20         | 6700                                          | <b>5600</b>                                 | 7000  |
| Si_36         | 6200                                          | <b>3700</b>                                 | 6400  |
| Si_9.1 etched | 6600                                          | <b>5700</b>                                 | 7100  |
| Si_20 etched  | 7500                                          | <b>7400</b>                                 | 7200  |
| Si_36 etched  | 7100                                          | <b>6700</b>                                 | 7200  |

## References:

- s1. Zhou, S.; Pi, X.; Ni, Z.; Ding, Y.; Jiang, Y.; Jin, C.; Delerue, C.; Yang, D.; Nozaki, T. Comparative Study on the Localized Surface Plasmon Resonance of Boron- and Phosphorus-Doped Silicon Nanocrystals *ACS Nano* **2015**, 9, 378.
- s2. Stuart, B. *Infrared spectroscopy: fundamentals and applications*; John Wiley & Sons, 2004.
- s3. Yuhnevich, G. V. *Infrared spectroscopy of water*; Nauka: Moscow, 1973.
- s4. Mendelsberg, R. J.; Garcia, G.; Li, H.; Manna, L.; Milliron, D. J. Understanding the Plasmon Resonance in Ensembles of Degenerately Doped Semiconductor Nanocrystals *J. Phys. Chem. C* **2012**, 116, 12226.
- s5. Lannoo, M.; Delerue, C.; Allan, G. Screening in Semiconductor Nanocrystallites and Its Consequences for Porous Silicon *Phys. Rev. Lett.* **1995**, 74, 3415.
- s6. Grigor'ev, I. S.; Mejlihov, E. Z. *Physical values*; Energoatomizdat: Moscow, 1991.
- s7. Efimov, A. M.; *Optical Constants of Inorganic Glasses*; CRC Press: Boca Raton, FL, 1995.
- s8. Bohren, C. F.; Huffman, D. R. *Absorption and Scattering of Light by Small Particles*; Wiley-VCH: Weinheim, 2004.
